# Supplementary material for: Multi-scale in-silico modelling to unveil structural requirements for DNA-PK inhibitors as radiosensitizers and MolSHAP based design of novel ligands
Source: Research Square preprint supplement (doi:10.21203/rs.3.rs-7479073/v1), 2025-09-19
Supplement: Supplementary file 1 [file 7f4d92cf0c14640381ab3bfe.docx]

**Multi-scale in-silico modelling to unveil structural requirements for DNA-PK inhibitors as radiosensitizers and MolSHAP based design of novel ligands**

**Soumya Mitraa,b, Rakesh Kumar Dolaia, Nilanjan Ghoshb, Subhash C. Mandalb and Amit Kumar Haldera***

aDr. B. C. Roy College of Pharmacy & Allied Health Sciences, Durgapur 713206, India

bDepartment Of Pharmaceutical Technology, Jadavpur University, Kolkata 700032, India

**Correspondence:** Amit Kumar Halder, [amit.halder@bcrcp.org](mailto:amit.halder@bcrcp.org)

**Associated content:**

1. **Table S1.** Details of the structures and biological activity of the set of compounds used in this work.
2. Detailed description of the statistical parameters used in estimating the predictive quality of the 2D-QSAR models.
3. Methodology and dataset division strategies for 3D-QSAR model development
4. Set-up for MD simulation and its analyses
5. **Table S2:** Detailed description of descriptors of M1 model and their relationship with DNA-PK inhibitory potential
6. **Figure S1.** The aligned structure of **41** with bioactive and docked conformations of AZD7648 and **78**, respectively (left). The interaction of minimized aligned structure of **41** at the binding site of DNA-PK.

**Table S1** Details of the structures and biological activity of the set of compounds used in this work

| **Compound ID** | **Smiles** | **DNA-PK IC50 (nM)** | **pIC50** |
| --- | --- | --- | --- |
| 6 | O=C(N1C2CCCC2)N(C)C3=C1C=C(NC4=CC=CC=C4)N=C3 | 4340 | 5.363 |
| 7 | O=C(N1C2CCCC2)N(C)C3=C1C=C(NC4=CC=C(C)C=C4)N=C3 | 3110 | 5.507 |
| 8 | O=C(N1C2CCCC2)N(C)C3=C1C=C(NC4=CC=CC(C)=C4)N=C3 | 3160 | 5.5 |
| 9 | O=C(N1C2CCCC2)N(C)C3=C1C=C(NC4=CC=CC=C4C)N=C3 | 185 | 6.733 |
| 10 | O=C(N1C2CCCC2)N(C)C3=C1C=C(NC4=CC=C(OC)C=C4)N=C3 | 282 | 6.55 |
| 11 | O=C(N1C2CCCC2)N(C)C3=C1C=C(NC4=CC=CC(OC)=C4)N=C3 | 6090 | 5.215 |
| 13 | O=C(N1C2CCCC2)N(C)C3=C1C=C(NC4=CC=C(Cl)C=C4)N=C3 | 565 | 6.248 |
| 14 | O=C(N1C2CCCC2)N(C)C3=C1C=C(NC4=CC=CC(Cl)=C4)N=C3 | 3780 | 5.423 |
| 15 | O=C(N1C2CCCC2)N(C)C3=C1C=C(NC4=CC=CC=C4Cl)N=C3 | 1750 | 5.757 |
| 17 | O=C(N1C2CCCC2)N(C)C3=C1C=C(NC4=CC=CC([N+]([O-])=O)=C4)N=C3 | 2000 | 5.699 |
| 19 | O=C(N1C2CCCC2)N(C)C3=C1C=C(NC4=CC=C(N)C=C4)N=C3 | 7600 | 5.119 |
| 20 | O=C(N1C2CCCC2)N(C)C3=C1C=C(NC4=CC=CC(N)=C4)N=C3 | 10000 | 5 |
| 21 | O=C(N1C2CCCC2)N(C)C3=C1C=C(NC4=CC=CC=C4N)N=C3 | 8100 | 5.092 |
| 22 | CC(NC1=CC=C(NC2=CC3=C(N(C)C(N3C4CCCC4)=O)C=N2)C=C1)=O | 2490 | 5.604 |
| 23 | CC(NC1=CC=CC(NC2=CC3=C(N(C)C(N3C4CCCC4)=O)C=N2)=C1)=O | 8100 | 5.092 |
| 25 | N#CC1=CC=C(NC2=CC3=C(N(C)C(N3C4CCCC4)=O)C=N2)C=C1 | 6200 | 5.208 |
| 26 | N#CC1=CC=CC(NC2=CC3=C(N(C)C(N3C4CCCC4)=O)C=N2)=C1 | 4030 | 5.395 |
| 29 | O=C(N1C2CCCC2)N(C)C3=C1C=C(NC4=CC=CC(C(F)(F)F)=C4)N=C3 | 3610 | 5.442 |
| 31 | O=C(N1C2CCCC2)N(C)C3=C1C=C(NC4=CC=C(C(C)=O)C=C4)N=C3 | 3130 | 5.504 |
| 32 | O=C(N1C2CCCC2)N(C)C3=C1C=C(NC4=CC=CC(C(C)=O)=C4)N=C3 | 1090 | 5.963 |
| 33 | O=C(N1C2CCCC2)N(C)C3=C1C=C(NC4=CC=C(S(=O)(C)=O)C=C4)N=C3 | 8830 | 5.054 |
| 34 | O=C(N1C2CCCC2)N(C)C3=C1C=C(NC4=CC=CC(S(=O)(C)=O)=C4)N=C3 | 1220 | 5.914 |
| 39 | O=C(N1C2CCCC2)N(C)C3=C1C=C(NC4=CC=C(O)C=C4)N=C3 | 245 | 6.611 |
| 40 | O=C(N1C2CCCC2)N(C)C3=C1C=C(NC4=CC=CC(O)=C4)N=C3 | 5200 | 5.284 |
| 41 | O=C(N1C2CCCC2)N(C)C3=C1C=C(NC4=CC=CC=C4O)N=C3 | 10000 | 5 |
| 42 | CC(C)(C1=CC=C(NC2=CC3=C(N(C)C(N3C4CCCC4)=O)C=N2)C=C1)C#N | 8180 | 5.087 |
| 43 | O=C(N1C2CCCC2)N(C)C3=C1C=C(NC4=CC=C(C)C=C4C)N=C3 | 62.8 | 7.202 |
| 44 | O=C(N1C2CCCC2)N(C)C3=C1C=C(NC4=CC=CC(C)=C4C)N=C3 | 4320 | 5.365 |
| 45 | O=C(N1C2CCCC2)N(C)C3=C1C=C(NC4=CC=C(C)C(C)=C4)N=C3 | 2380 | 5.623 |
| 46 | O=C(N1C2CCCC2)N(C)C3=C1C=C(NC4=CC=CC(Cl)=C4C)N=C3 | 625 | 6.204 |
| 47 | O=C(N1C2CCCC2)N(C)C3=C1C=C(NC4=CC=C(Cl)C=C4C)N=C3 | 18 | 7.745 |
| 48 | O=C(N1C2CCCC2)N(C)C3=C1C=C(NC4=CC(Cl)=CC=C4C)N=C3 | 40 | 7.398 |
| 49 | O=C(N1C2CCCC2)N(C)C3=C1C=C(NC4=CC=C(S(=O)(C)=O)C=C4C)N=C3 | 137 | 6.863 |
| 50 | O=C(N1C2CCCC2)N(C)C3=C1C=C(NC4=CC(S(=O)(C)=O)=CC=C4C)N=C3 | 7.54 | 8.123 |
| 51 | N#CC1=CC=C(NC2=CC3=C(N(C)C(N3C4CCCC4)=O)C=N2)C(C)=C1 | 75 | 7.125 |
| 52 | N#CC1=CC=C(NC2=CC3=C(N(C)C(N3C4CCCC4)=O)C=N2)C=C1C | 5040 | 5.298 |
| 53 | O=C(N1C2CCCC2)N(C)C3=C1C=C(NC4=CC=C(OC)C=C4C)N=C3 | 7.35 | 8.134 |
| 54 | O=C(N1C2CCCC2)N(C)C3=C1C=C(NC4=CC(OC)=CC=C4C)N=C3 | 72.8 | 7.138 |
| 55 | O=C(N1C2CCCC2)N(C)C3=C1C=C(NC4=CC=C(OCC5=CC=CC=C5)C=C4C)N=C3 | 201 | 6.697 |
| 56 | O=C(N1C2CCCC2)N(C)C3=C1C=C(NC4=CC=C(O)C=C4C)N=C3 | 7.27 | 8.138 |
| 57 | O=C(N1C2CCCC2)N(C)C3=C1C=C(NC4=CC=C(F)C=C4C)N=C3 | 22.4 | 7.65 |
| 58 | O=C(N1C2CCCC2)N(C)C3=C1C=C(NC4=CC=C(OC(F)(F)F)C=C4C)N=C3 | 284 | 6.547 |
| 59 | O=C(N1C2CCCC2)N(C)C3=C1C=C(NC4=CC=C(OC(F)F)C=C4C)N=C3 | 29.8 | 7.526 |
| 60 | O=C(N1C2CCCC2)N(C)C3=C1C=C(NC4=CC=C(OCC)C=C4C)N=C3 | 72.8 | 7.138 |
| 61 | O=C(N1C2CCCC2)N(C)C3=C1C=C(NC4=CC=C(NCCN(C)C)C=C4C)N=C3 | 100 | 7 |
| 66 | O=C(N1C2CCCC2)N(C)C3=C1C=C(NC4=CC=C(OC)C=C4Cl)N=C3 | 94 | 7.027 |
| 68 | O=C(N1C2CCCC2)N(C)C3=C1C=C(N(C4=CC=C(OC)C=C4C)C)N=C3 | 411 | 6.386 |
| 69 | O=C(N1C2CCCC2)N(CCOC)C3=C1C=C(NC4=CC=C(OC)C=C4C)N=C3 | 97 | 7.013 |
| 70 | O=C(N1C2CCCC2)N(CCOCC3=CC=CC=C3)C4=C1C=C(NC5=CC=C(OC)C=C5C)N=C4 | 147 | 6.833 |
| 71 | O=C(N1C2CCCC2)N(CCO)C3=C1C=C(NC4=CC=C(OC)C=C4C)N=C3 | 138 | 6.86 |
| 72 | O=C(N1C2CCCC2)N(C(C)C)C3=C1C=C(NC4=CC=C(OC)C=C4C)N=C3 | 1060 | 5.975 |
| 73 | O=C(N1C2CCCC2)N(C3CCCC3)C4=C1C=C(NC5=CC=C(OC)C=C5C)N=C4 | 1930 | 5.714 |
| 74 | O=C(N1C2CCCC2)N(CC3=CC=CC=C3)C4=C1C=C(NC5=CC=C(OC)C=C5C)N=C4 | 108 | 6.967 |
| 75 | O=C(N1CCOC)N(C)C2=C1C=C(NC3=CC=C(OC)C=C3C)N=C2 | 138 | 6.86 |
| 77 | O=C(N1C2COCC2)N(C)C3=C1C=C(NC4=CC=C(OC)C=C4C)N=C3 | 6.5 | 8.187 |
| 78 | O=C(N1C2CCOCC2)N(C)C3=C1C=C(NC4=CC=C(OC)C=C4C)N=C3 | 7.95 | 8.1 |
| 79 | O=C(N1CC2CCOCC2)N(C)C3=C1C=C(NC4=CC=C(OC)C=C4C)N=C3 | 140 | 6.854 |
| 80 | O=C(N1CCC2CCOCC2)N(C)C3=C1C=C(NC4=CC=C(OC)C=C4C)N=C3 | 7.1 | 8.149 |
| 81 | O=C(N1C2CCC(OC)CC2)N(C)C3=C1C=C(NC4=CC=C(OC)C=C4C)N=C3 | 40.4 | 7.394 |
| 82 | O=C(N1C2CCC(OCC3=CC=CC=C3)CC2)N(C)C4=C1C=C(NC5=CC=C(OC)C=C5C)N=C4 | 32 | 7.495 |
| 83 | O=C(N1C2CCC(O)CC2)N(C)C3=C1C=C(NC4=CC=C(OC)C=C4C)N=C3 | 6.2 | 8.208 |
| 84 | O=C(N1C2=CC=CC=C2)N(C)C3=C1C=C(NC4=CC=C(OC)C=C4C)N=C3 | 5.6 | 8.252 |
| 85 | O=C(N1C2=CC=C(OC)C=C2)N(C)C3=C1C=C(NC4=CC=C(OC)C=C4C)N=C3 | 7 | 8.155 |
| 86 | O=C(N1C2=CC=C(OCC3=CC=CC=C3)C=C2)N(C)C4=C1C=C(NC5=CC=C(OC)C=C5C)N=C4 | 4.85 | 8.314 |
| 87 | O=C(N1C2=CC=C(O)C=C2)N(C)C3=C1C=C(NC4=CC=C(OC)C=C4C)N=C3 | 4.4 | 8.357 |
| 88 | CC(C)(C1=CC=C(N(C2=C3C=NC(NC4=CC=C(OC)C=C4C)=C2)C(N3C)=O)C=C1)C#N | 2.12 | 8.674 |
| 89 | O=C(N1CCC(N(C2=C3C=NC(NC4=CC=C(OC)C=C4C)=C2)C(N3C)=O)CC1)OC(C)(C)C | 43 | 7.367 |
| 90 | O=C(N1C2CCNCC2)N(C)C3=C1C=C(NC4=CC=C(OC)C=C4C)N=C3 | 77 | 7.114 |
| 91 | O=C(N1CCC(CN(C2=C3C=NC(NC4=CC=C(OC)C=C4C)=C2)C(N3C)=O)CC1)OC(C)(C)C | 150 | 6.824 |
| 92 | O=C(N1CC2CCNCC2)N(C)C3=C1C=C(NC4=CC=C(OC)C=C4C)N=C3.[H]Cl.[H]Cl | 1290 | 5.889 |
| 93 | O=C(OC(C)(C)C)NC1CCC(N(C2=C3C=NC(NC4=CC=C(OC)C=C4C)=C2)C(N3C)=O)CC1 | 53 | 7.276 |
| 94 | O=C(N1C2CCC(N)CC2)N(C)C3=C1C=C(NC4=CC=C(OC)C=C4C)N=C3 | 40 | 7.398 |
| 95 | O=C(N1C2CCN(C)CC2)N(C)C3=C1C=C(NC4=CC=C(OC)C=C4C)N=C3.[H]Cl | 157 | 6.804 |

***Statistical evaluation of the developed 2D-QSAR models***

The statistical significance and the predictive accuracy of the models were estimated by different metrics which included (leave-on-out cross validated) *Q2LOO,* providing an assessment of the internal predictive quality of the model and *R2Pred* (Predicted *R2* or *Q2F1*); an assesment for the external predictivity of the model. *Q2LOO* can be equated by:

Here, represents the experimentally obtained activity of the *ith* data point from the training set compounds, is the predicted activity for the *ith* data point when that data point is excluded from the model training, and denotes the mean observed activity of all compounds in the training set. In contrast, *R2Pred* determines the predictive quality of a model on external datapoints (test set). It can be determined by:

The most robust model was identified by averaging the *Q2LOO* and the *R2Pred*. Additional evaluation metric included *R²*), adjusted R² (*R²Adj*), Fisher's statistic (*F-test*), mean absolute error (*MAE*), and the *rm²* and *Δrm²* values for both training and test sets. Descriptors inter-correlation was determined with cross-correlation matrices while multi-collinearity of the final model was estimated with variance inflation factor [*VIF = 1/(1‒Rᵢ²)*] where *Rᵢ²* can be calculated by regressing the *ith* descriptor against all other. The robust nature of the model was further validated by 1000 iterations of Y-randomization operation where c*R*2p value is estimated to identify the random nature of the model:

c*R*2p= *R*√ (*R*2 − *R*r2)

Here *R*r2 is the mean of the R2 from the randomized model. A c*R*2p value greater than 0.5 indicates that the model has arisen by chance [1].

***Methodology and dataset division strategies for 3D-QSAR model development***

In 3D-QSAR analysis, electrostatic fields were computed through a molecular mechanics (MM) force-field approach. Consistent with standard QSAR protocols, the dataset was randomly split into a training subset (80%) for model construction and an external prediction subset; test set (20%), for validation. The aligned ligands were examined using two distinct types of probes; a carbon atom and a positively-charged volume-less probe; to compute the contribution of electrostatic and steric fields. Initially, the dataset was pre-treated by applying a smart region definition (SRD) cut-off of 2.0 and excluding N-level variables. SRD partitions variables based on their three-dimensional spatial distribution, and in this study, variable reduction was achieved through two methods; *(a)* Fractional Factorial Design-based variable SELection (FFD-SEL), and *(b)* Uninformative Variable Elimination-based Partial Least Square (UVE-PLS). The resultant models were statistically evaluated using the coefficient of determination (*R2*), standardized error of calibration (SDEC), F-statistics, and several other forms of cross-validated *Q2* values: leave-one-out (*Q2LOO*), leave-two-out (*Q2LTO*) and leave-many-out (*Q2LMO*, 5 groups, 20 runs). Predictive performance was further assessed using *R2Pred* and the standardized error of prediction (SDEP). To ensure the models were not generated by chance, progressive scrambling was applied with a critical threshold of 0.8, LMO grouping (5 groups, 20 runs), and 20 randomization cycles. The scrambling-derived fitted *q2* values (*Q2s*) were notably lower than *Q2LMO*, confirming robust nature of the models [2, 3].

***Set-up for MD simulation and its analyses***

In short, ligand parameterization was carried out in AMBER20 using LEaP module in conjunction with the General Amber Force Field (GAFF) through Antechamber utilization. Molecular dynamics simulations employed the ff99SB force field with a TIP3P explicit water, solvating the complex in a cubic box with an 8Å buffer distance from all sides. The Berendsen barostat was used to maintain constant pressure, and the Langevin thermostat controlled the temperature. Protein structures were prepared by protonating at pH 7.0 using the PDB2PQR webserver (<https://server.poissonboltzmann.org/pdb2pqr>). Trajectory analyses were carried out by deploying PTTRAJ and CPPTRAJ software whereas various plots related to these analyses were visualized by using QtGrace (<https://sourceforge.net/projects/qtgrace/>). The energy contributions of individual binding site residues were assessed through per-residue free energy decomposition analysis using MM-GBSA module of AMBER. Energy components, including van der Waals, electrostatic, polar solvation and non-polar solvation were calculated based on the final 10ns of the MD simulations [4, 5].

**Table S2** Detailed description of descriptors of M1 model and their relationship with DNA-PK inhibitory potential [6]

| **Name** | **Description** | **Category** | **Relation with Activity** |
| --- | --- | --- | --- |
| VE1sign_B(m) | Coefficient sum of the last eigenvector of the burden matrix, weighted by atomic mass | 2D matrix-based descriptors | Negative |
| GATS8v | Geary autocorrelation at lag 8, weighted by van der Waals volume | 2D autocorrelations | Negative |
| TDB03p | 3D topological descriptor (lag 3, weighted by polarizability) | 3D autocorrelations | Positive |
| L3v | 3rd directional WHIM component weighted by van der Waals volume | WHIM descriptors | Positive |
| F02[C-N] | Frequency of C and N atoms at topological distance of 2 within a molecular structure | 2D Atom Pairs | Negative |
| CATS3D_02_DL | Frequency of donor-lipophilic feature pairs occurring at a 3D distance of 2.0-3.0Å | CATS 3D descriptors | Positive |
| WHALES20_IR | Isolation-remoteness ratio of atoms in the molecule, at the 20th percentile | WHALES descriptors | Positive |

**
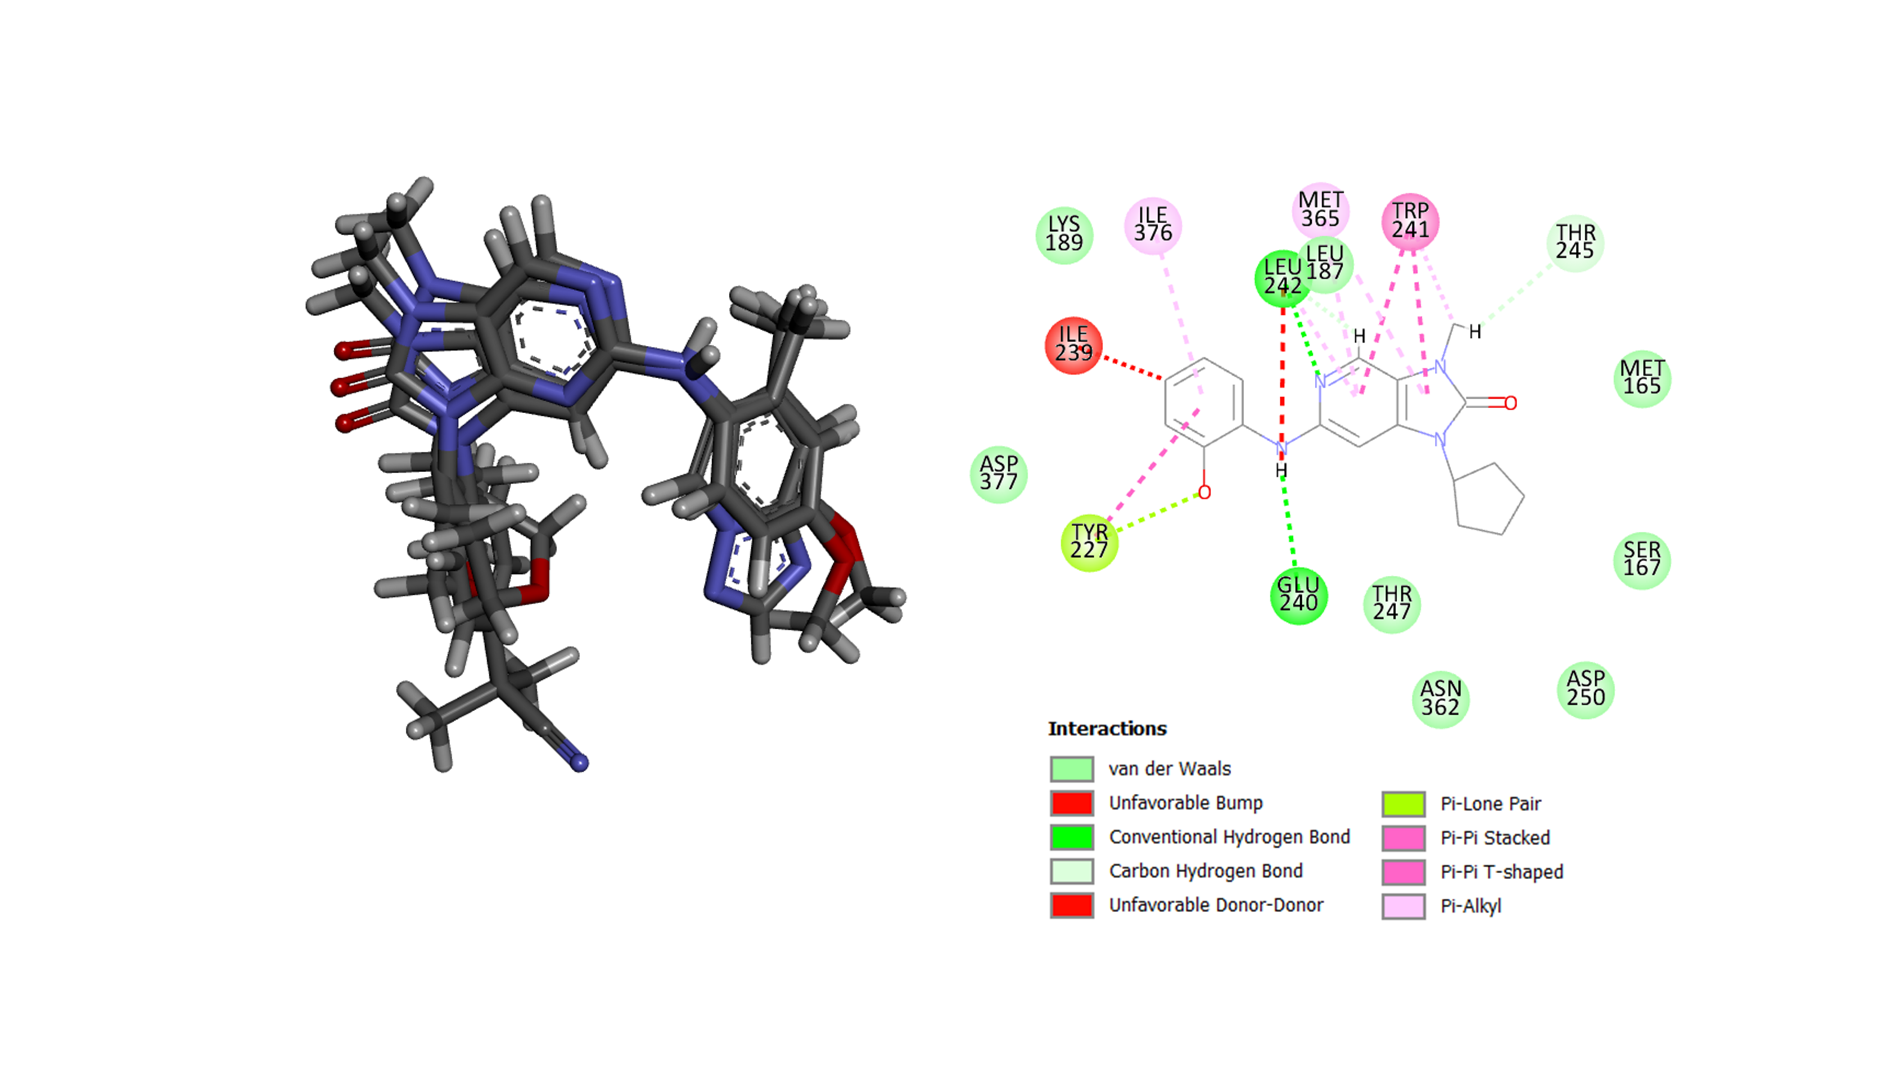
Fig. S1** The aligned structure of **41** with bioactive and docked conformations of AZD7648 and **78**, respectively (left). The interaction of minimized aligned structure of **41** at the binding site of DNA-PK.

**Reference**

1. Gramatica P (2007) Principles of QSAR models validation: internal and external. 26:694-701. <https://doi.org/https://doi.org/10.1002/qsar.200610151>.

2. Tosco P, Balle T (2011) Open3DQSAR: a new open-source software aimed at high-throughput chemometric analysis of molecular interaction fields. J Mol Model 17:201-8. <https://doi.org/10.1007/s00894-010-0684-x>.

3. Tosco P, Balle T, Shiri F (2011) Open3DALIGN: an open-source software aimed at unsupervised ligand alignment. J Comput Aided Mol Des 25:777-83. <https://doi.org/10.1007/s10822-011-9462-9>.

4. Case DA, Cheatham TE, 3rd, Darden T, Gohlke H, Luo R, Merz KM, Jr., et al. (2005) The Amber biomolecular simulation programs. J Comput Chem 26:1668-88. <https://doi.org/10.1002/jcc.20290>.

5. Case DA, Aktulga HM, Belfon K, Cerutti DS, Cisneros GA, Cruzeiro VWD, et al. (2023) AmberTools. Journal of Chemical Information and Modeling 63:6183-91. <https://doi.org/10.1021/acs.jcim.3c01153>.

6. Todeschini R, Consonni V (2008) Handbook of molecular descriptors. John Wiley & Sons, Place.
